# Supplementary material for: Basal ganglia and cerebellar interconnectivity within the human thalamus
Source: Springer Nature journal article supplement (doi:10.1007/s00429-016-1223-z), 2016-04-18

## SUPPLEMENTARY MATERIAL

### S1 Seed and target mask outline used for tractography

**Figure S1:** Example of seed and target masks, which were included in the tractography analysis. GP: Globus pallidus (internal and external part); Thal: Thalamus; DN: Dentate nucleus

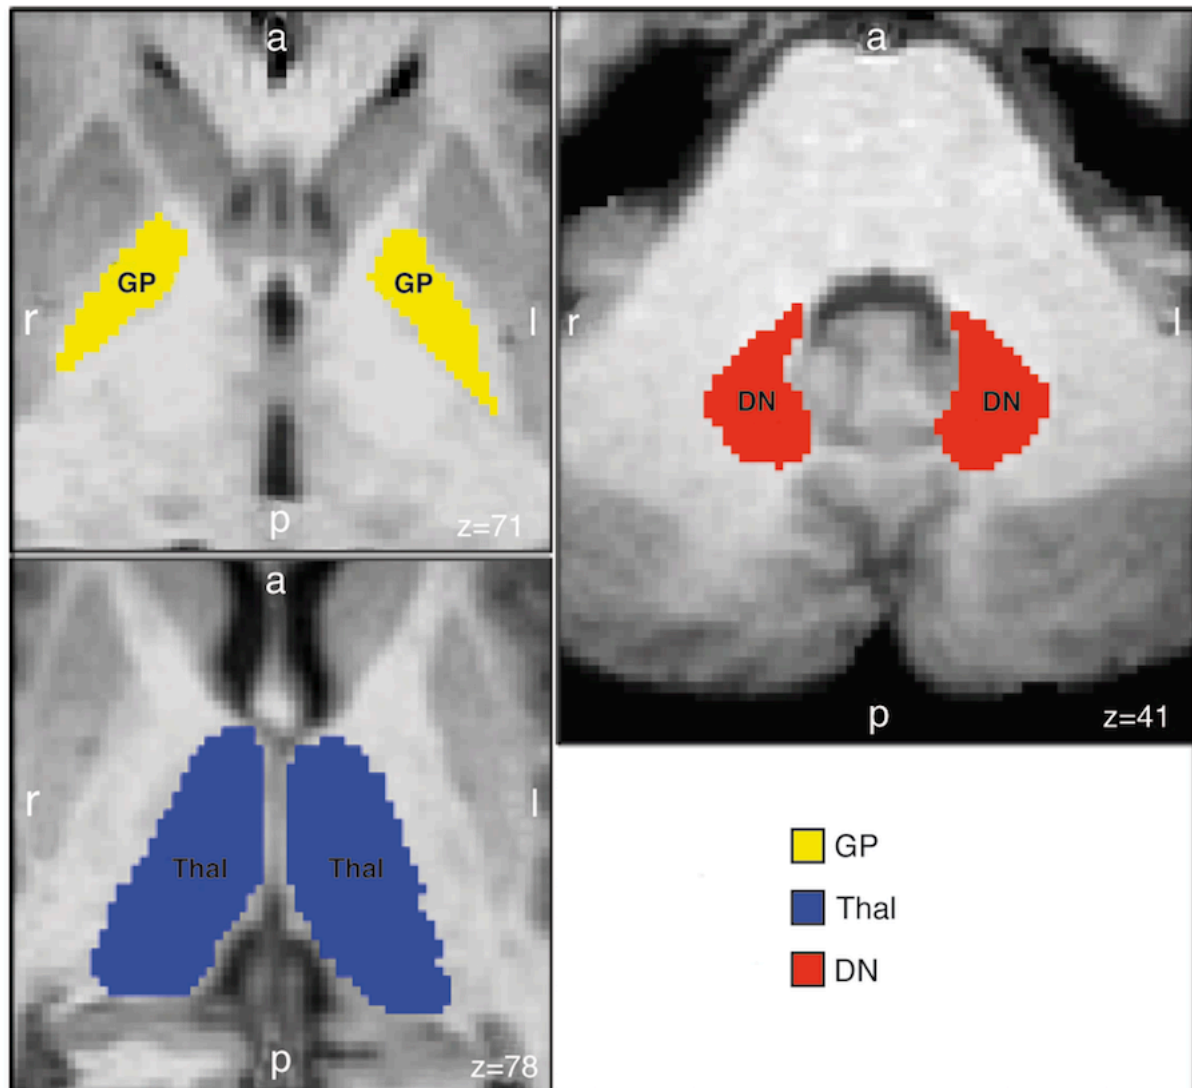

### S2 Connectivity fingerprints for pallido-thalamic and cerebello-thalamic projections

**Figure 2:** Connectional fingerprints for all thalamic projections not revealed in Figure 2. The values indicate the relative connection density for pallidal (in the A, left, and B, right hemisphere) or cerebellar (C, left; B, right) connectivity with thalamic sub-territories (for the connotation of different nuclei, please cf. Krauth et al., 2010, or Table 1).

A

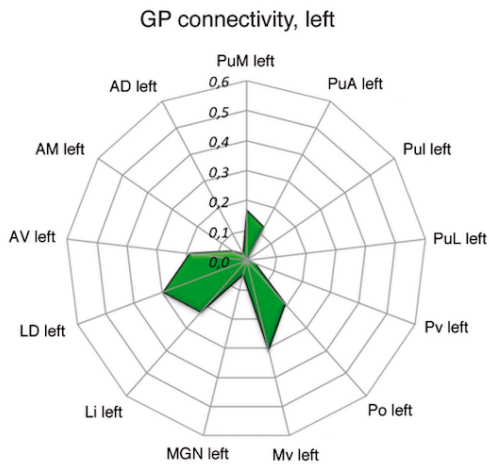

B

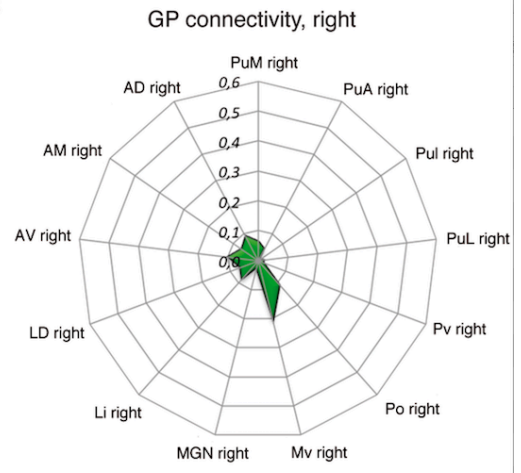

C

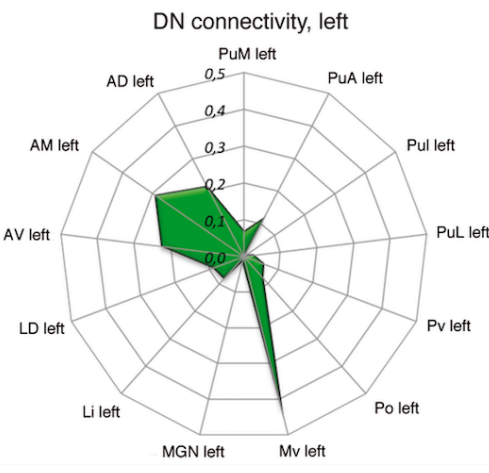

D

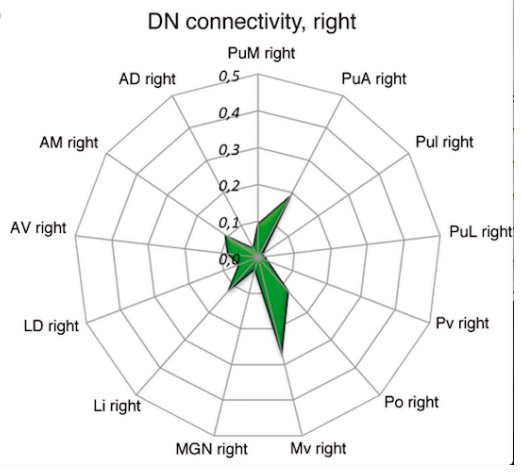

Supplement: MOESM1 [file 10029928]
